# Supplementary material for: Characterisation of mobile genetic elements in Mycoplasma hominis with the description of ICEHo-II, a variant mycoplasma integrative and conjugative element
Source: PubMed Central journal article supplement (PMC7648426; doi:10.1186/s13100-020-00225-9), 2020-11-07
Supplement: 13100_2020_225_MOESM1_ESM.pdf [file 13100_2020_225_MOESM1_ESM.pdf]

# CDS6-Homologues

## A. Phylogenetic Tree

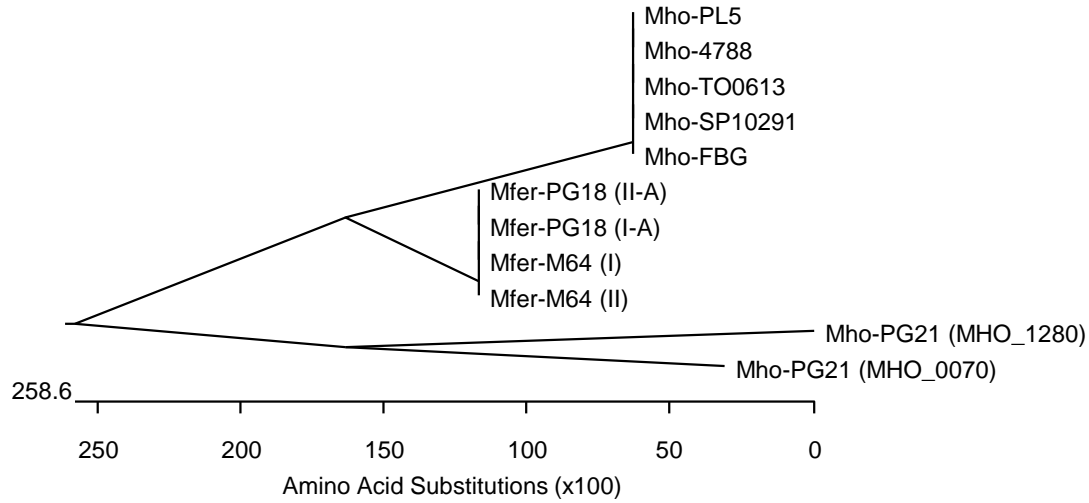

## B. Sequence Distances

|            |    | Percent Identity |       |       |       |       |       |       |       |       |       |      |    |                     |
|------------|----|------------------|-------|-------|-------|-------|-------|-------|-------|-------|-------|------|----|---------------------|
|            |    | 1                | 2     | 3     | 4     | 5     | 6     | 7     | 8     | 9     | 10    | 11   |    |                     |
| Divergence | 1  | █                | 100.0 | 100.0 | 100.0 | 32.3  | 32.3  | 32.3  | 32.3  | 32.3  | 11.3  | 14.5 | 1  | Mfer-PG18 (II-A)    |
|            | 2  | 0.0              | █     | 100.0 | 100.0 | 32.3  | 32.3  | 32.3  | 32.3  | 32.3  | 11.3  | 14.5 | 2  | Mfer-PG18 (I-A)     |
|            | 3  | 0.0              | 0.0   | █     | 100.0 | 32.3  | 32.3  | 32.3  | 32.3  | 32.3  | 11.3  | 14.5 | 3  | Mfer-M64 (I)        |
|            | 4  | 0.0              | 0.0   | 0.0   | █     | 32.3  | 32.3  | 32.3  | 32.3  | 32.3  | 11.3  | 14.5 | 4  | Mfer-M64 (II)       |
|            | 5  | 146.6            | 146.6 | 146.6 | 146.6 | █     | 100.0 | 100.0 | 100.0 | 100.0 | 11.1  | 11.1 | 5  | Mho-FBG             |
|            | 6  | 146.6            | 146.6 | 146.6 | 146.6 | 0.0   | █     | 100.0 | 100.0 | 100.0 | 11.1  | 11.1 | 6  | Mho-SP10291         |
|            | 7  | 146.6            | 146.6 | 146.6 | 146.6 | 0.0   | 0.0   | █     | 100.0 | 100.0 | 11.1  | 11.1 | 7  | Mho-TO0613          |
|            | 8  | 146.6            | 146.6 | 146.6 | 146.6 | 0.0   | 0.0   | 0.0   | █     | 100.0 | 11.1  | 11.1 | 8  | Mho-PL5             |
|            | 9  | 146.6            | 146.6 | 146.6 | 146.6 | 0.0   | 0.0   | 0.0   | 0.0   | █     | 11.1  | 11.1 | 9  | Mho-4788 (MhoE)     |
|            | 10 | 430.0            | 430.0 | 430.0 | 430.0 | 430.0 | 430.0 | 430.0 | 430.0 | 430.0 | █     | 16.7 | 10 | Mho-PG21 (MHO_1280) |
|            | 11 | 339.0            | 339.0 | 339.0 | 339.0 | 447.0 | 447.0 | 447.0 | 447.0 | 447.0 | 296.0 | █    | 11 | Mho-PG21 (MHO_0070) |
|            |    | 1                | 2     | 3     | 4     | 5     | 6     | 7     | 8     | 9     | 10    | 11   |    |                     |

## C. Multiple Sequence Alignment

|   | 10 |   |   |   |   |   |   |   |   |   | 20 |   |   |   |   |   |   |   |   |   | 30 |   |   |   |   |   |   |   |   |   | 40 |   |   |   |   |   |   |   |   |   | 50 |   |   |   |   |   |   |   |   |   | 60 |   |   |   |   |   |   |   |   |   |   |   |   |   |                     |   |                     |
|---|----|---|---|---|---|---|---|---|---|---|----|---|---|---|---|---|---|---|---|---|----|---|---|---|---|---|---|---|---|---|----|---|---|---|---|---|---|---|---|---|----|---|---|---|---|---|---|---|---|---|----|---|---|---|---|---|---|---|---|---|---|---|---|---|---------------------|---|---------------------|
| 1 | M  | K | R | Y | F | Y | R | I | R | - | V  | K | K | N | L | E | S | K | K | T | K  | S | Y | A | V | C | S | - | N | F | N  | E | A | D | K | I | A | N | E | I | I  | E | K | G | D | Y | G | - | - | W | V  | Q | V | E | R | V | E | K | I | K | H | Y | F | K | E                   | V | Mfer-PG18 (II-A)    |
| 1 | M  | K | R | Y | F | Y | R | I | R | - | V  | K | K | N | L | E | S | K | K | T | K  | S | Y | A | V | C | S | - | N | F | N  | E | A | D | K | I | A | N | E | I | I  | E | K | G | D | Y | G | - | - | W | V  | Q | V | E | R | V | E | K | I | K | H | Y | F | K | E                   | V | Mfer-PG18 (I-A)     |
| 1 | M  | K | R | Y | F | Y | R | I | R | - | V  | K | K | N | L | E | S | K | K | T | K  | S | Y | A | V | C | S | - | N | F | N  | E | A | D | K | I | A | N | E | I | I  | E | K | G | D | Y | G | - | - | W | V  | Q | V | E | R | V | E | K | I | K | H | Y | F | K | E                   | V | Mfer-M64 (I)        |
| 1 | M  | K | R | Y | F | Y | R | I | R | - | V  | K | K | N | L | E | S | K | K | T | K  | S | Y | A | V | C | S | - | N | F | N  | E | A | D | K | I | A | N | E | I | I  | E | K | G | D | Y | G | - | - | W | V  | Q | V | E | R | V | E | K | I | K | H | Y | F | K | E                   | V | Mfer-M64 (II)       |
| 1 | M  | S | K | Y | F | Y | R | L | R | G | S  | Q | S | T | G | K | N | A | K | T | Y  | S | F | G | S | A | Q | - | Q | Y | N  | K | A | L | I | M | A | Q | D | A | I  | S | K | N | Q | F | K | - | - | E | V  | Q | I | E | R | I | Q | V | I | K | I | I | K | Q | N                   | S | Mho-FBG             |
| 1 | M  | S | K | Y | F | Y | R | L | R | G | S  | Q | S | T | G | K | N | A | K | T | Y  | S | F | G | S | A | Q | - | Q | Y | N  | K | A | L | I | M | A | Q | D | A | I  | S | K | N | Q | F | K | - | - | E | V  | Q | I | E | R | I | Q | V | I | K | I | I | K | Q | N                   | S | Mho-SP10291         |
| 1 | M  | S | K | Y | F | Y | R | L | R | G | S  | Q | S | T | G | K | N | A | K | T | Y  | S | F | G | S | A | Q | - | Q | Y | N  | K | A | L | I | M | A | Q | D | A | I  | S | K | N | Q | F | K | - | - | E | V  | Q | I | E | R | I | Q | V | I | K | I | I | K | Q | N                   | S | Mho-TO0613          |
| 1 | M  | S | K | Y | F | Y | R | L | R | G | S  | Q | S | T | G | K | N | A | K | T | Y  | S | F | G | S | A | Q | - | Q | Y | N  | K | A | L | I | M | A | Q | D | A | I  | S | K | N | Q | F | K | - | - | E | V  | Q | I | E | R | I | Q | V | I | K | I | I | K | Q | N                   | S | Mho-PL5             |
| 1 | M  | S | K | Y | F | Y | R | L | R | G | S  | Q | S | T | G | K | N | A | K | T | Y  | S | F | G | S | A | Q | - | Q | Y | N  | K | A | L | I | M | A | Q | D | A | I  | S | K | N | Q | F | K | - | - | E | V  | Q | I | E | R | I | Q | V | I | K | I | I | K | Q | N                   | S | Mho-4788 (MhoE)     |
| 1 | M  | P | K | M | K | T | K | S | G | - | L  | K | K | R | I | S | I | T | E | S | G  | K | V | K | R | G | Q | - | A | F | R  | S | H | L | A | Q | N | K | T | T | K  | Q | K | R | H | A | R | - | - | K | A  | T | T | L | S | S | S | D | F | K | R | Y | K | E | Mho-PG21 (MHO_1280) |   |                     |
| 1 | M  | P | G | R | D | Q | L | T | G | - | Q  | K | A | L | S | G | N | K | R | S | H  | A | L | N | T | A | K | R | T | F | D  | L | N | L | Q | K | V | T | V | L | T  | E | T | G | S | K | K | T | V | R | V  | T | A | K | N | A | R | T | L | K | K | Y | G | L | V                   | A | Mho-PG21 (MHO_0070) |
